**PS Form 3526**

**Statement of Ownership, Management, and Circulation  
(All Periodicals Publications Except Requester Publications)**

|                                                                                                                                                                                                                                                                                                                                                                                                                                                                                                                                                                                |                                                                                           |                         |                                                                             |
|--------------------------------------------------------------------------------------------------------------------------------------------------------------------------------------------------------------------------------------------------------------------------------------------------------------------------------------------------------------------------------------------------------------------------------------------------------------------------------------------------------------------------------------------------------------------------------|-------------------------------------------------------------------------------------------|-------------------------|-----------------------------------------------------------------------------|
| <b>1. Publication Title</b><br>AMERICAN PSYCHIATRIC ASSOCIATION/<br>PSYCHIATRIC SERVICES                                                                                                                                                                                                                                                                                                                                                                                                                                                                                       | <b>2. Publication Number</b><br>251280                                                    | <b>ISSN</b><br>10752730 | <b>3. Filing Date</b><br>09/13/2017                                         |
| <b>4. Issue Frequency</b><br>MONTHLY                                                                                                                                                                                                                                                                                                                                                                                                                                                                                                                                           | <b>5. Number of Issues Published Annually</b><br>12                                       |                         | <b>6. Annual Subscription Price</b><br>\$ 155.00                            |
| <b>7. Complete Mailing Address of Known Office of Publication</b><br>1000 WILSON BLVD STE 1825<br>ARLINGTON, ARLINGTON, VA 22209-3924                                                                                                                                                                                                                                                                                                                                                                                                                                          |                                                                                           |                         | <b>Contact Person</b><br>ROGER DOMRAS<br><b>Telephone</b><br>(703) 907-8544 |
| <b>8. Complete Mailing Address of Headquarters or General Business Office of Publisher</b><br>1000 Wilson Blvd., Ste. 1825<br>Arlington, VA 22209-3924                                                                                                                                                                                                                                                                                                                                                                                                                         |                                                                                           |                         |                                                                             |
| <b>9. Full Names and Complete Mailing Addresses of Publisher, Editor, and Managing Editor</b>                                                                                                                                                                                                                                                                                                                                                                                                                                                                                  |                                                                                           |                         |                                                                             |
| <b>Publisher (Name and complete mailing address)</b><br>John McDuffie<br>1000 Wilson Blvd., Ste. 1825<br>Arlington, VA 22209-3924                                                                                                                                                                                                                                                                                                                                                                                                                                              |                                                                                           |                         |                                                                             |
| <b>Editor (Name and complete mailing address)</b><br>Lisa B. Dixon, M.D., M.P.H.<br>1000 Wilson Blvd., Ste. 1825<br>Arlington, VA 22209-3924                                                                                                                                                                                                                                                                                                                                                                                                                                   |                                                                                           |                         |                                                                             |
| <b>Managing Editor (Name and complete mailing address)</b><br>Demarie S. Jackson<br>1000 Wilson Blvd., Ste. 1825<br>Arlington, VA 22209-3924                                                                                                                                                                                                                                                                                                                                                                                                                                   |                                                                                           |                         |                                                                             |
| <b>10. Owner (Do not leave blank. If the publication is owned by a corporation, give the name and address of the corporation immediately followed by the names and addresses of all stockholders owning or holding 1 percent or more of the total amount of stock. If not owned by a corporation, give names and addresses of the individual owners. If owned by a partnership or other unincorporated firm, give its name and address as well as those of each individual owner. If the publication is published by a nonprofit organization, give its name and address.)</b> |                                                                                           |                         |                                                                             |
| <b>Full Name</b><br>American Psychiatric Assoc.                                                                                                                                                                                                                                                                                                                                                                                                                                                                                                                                | <b>Complete Mailing Address</b><br>1000 Wilson Blvd., Ste. 1825, Arlington, VA 22209-3924 |                         |                                                                             |
| <b>11. Known Bondholders, Mortgagees, and Other Security Holders Owning or Holding 1 Percent or More of Total Amount of Bonds, Mortgages, or Other Securities. If none, check box</b> <input checked="" type="checkbox"/> None                                                                                                                                                                                                                                                                                                                                                 |                                                                                           |                         |                                                                             |
| <b>Full Name</b>                                                                                                                                                                                                                                                                                                                                                                                                                                                                                                                                                               | <b>Complete Mailing Address</b>                                                           |                         |                                                                             |

PS Form 3526, September 2007 (Page 1)

**PRIVACY NOTICE:** See our privacy policy on [www.usps.com](http://www.usps.com)

|                                                                                                                                                                    |                                                                 |                                                                    |
|--------------------------------------------------------------------------------------------------------------------------------------------------------------------|-----------------------------------------------------------------|--------------------------------------------------------------------|
| <b>13. Publication Title</b><br>AMERICAN PSYCHIATRIC ASSOCIATION/PSYCHIATRIC SERVICES                                                                              | <b>14. Issue Date for Circulation Data Below</b><br>09/01/2017  |                                                                    |
| <b>15. Extend and Nature of Circulation</b>                                                                                                                        | <b>Average No. Copies Each Issue During Preceding 12 Months</b> | <b>No. Copies of Single Issue Published Nearest to Filing Date</b> |
| <b>a. Total Numbers of Copies (Net press run)</b>                                                                                                                  | 707                                                             | 574                                                                |
| <b>b. Paid Circulation (By Mail and Outside the Mail)</b>                                                                                                          |                                                                 |                                                                    |
| (1) Mailed Outside County Paid Subscriptions Stated on PS Form 3541 (include paid distribution above nominal rate, advertiser's proof copies, and exchange copies) | 285                                                             | 272                                                                |
| (2) Mailed In-County Paid Subscriptions Stated on PS Form 3541 (include paid distribution above nominal rate, advertiser's proof copies, and exchange copies)      | 0                                                               | 0                                                                  |
| (3) Paid Distribution Outside the Mails Including Sales Through Dealers and Carriers, Street Vendors, Counter Sales, and Other Paid Distribution Outside USPS      | 75                                                              | 67                                                                 |
| (4) Paid Distribution by Other Classes of Mail Through the USPS (e.g. First-Class Mail)                                                                            | 0                                                               | 0                                                                  |
| <b>c. Total Paid Distribution (Sum of 15b (1), (2), (3), (4))</b>                                                                                                  | 360                                                             | 339                                                                |
| <b>d. Free or Nominal Rate Distribution (By Mail and Outside the Mail)</b>                                                                                         |                                                                 |                                                                    |
| (1) Free or Nominal Rate Outside County Copies included on PS Form 3541                                                                                            | 117                                                             | 97                                                                 |
| (2) Free or Nominal Rate In-County Copies included on PS Form 3541                                                                                                 | 0                                                               | 0                                                                  |
| (3) Free or Nominal Rate Copies Mailed at Other Classes Through the USPS (e.g. First-Class Mail)                                                                   | 0                                                               | 0                                                                  |
| (4) Free or Nominal Rate Distribution Outside the Mail (carriers or other means)                                                                                   | 56                                                              | 56                                                                 |
| <b>e. Total Free or Nominal Rate Distribution (Sum of 15d (1), (2), (3), (4))</b>                                                                                  | 173                                                             | 153                                                                |
| <b>f. Total Distribution (Sum of 15c and 15e)</b>                                                                                                                  | 533                                                             | 492                                                                |
| <b>g. Copies not Distributed</b>                                                                                                                                   | 0                                                               | 0                                                                  |
| <b>h. Total (Sum of 15f and 15g)</b>                                                                                                                               | 533                                                             | 492                                                                |
| <b>i. Percent Paid ((15c / 15f) times 100)</b>                                                                                                                     | 67.54 %                                                         | 68.90 %                                                            |
| <b>16. If total circulation includes electronic copies, report that circulation on lines below.</b>                                                                |                                                                 |                                                                    |
| <b>a. Paid Electronic Copies</b>                                                                                                                                   | 0                                                               | 0                                                                  |
| <b>b. Total Paid Print Copies (Line 15c) + Paid Electronic Copies</b>                                                                                              | 0                                                               | 0                                                                  |
| <b>c. Total Print Distribution (Line 15f) + Paid Electronic Copies</b>                                                                                             | 0                                                               | 0                                                                  |
| <b>d. Percent Paid (Both Print and Electronic Copies)</b>                                                                                                          | 0.00 %                                                          | 0.00 %                                                             |
| <input type="checkbox"/> I certify that 50% of all my distributed copies (Electronic and Print) are paid above a nominal price.                                    |                                                                 |                                                                    |
| <b>17. Publication of Statement of Ownership</b>                                                                                                                   |                                                                 |                                                                    |

If the publication is a general publication, publication of this statement is required. Will be printed in the 11/01/2017 issue of this publication.  Publication not required.

|                                                                                 |                                    |                        |
|---------------------------------------------------------------------------------|------------------------------------|------------------------|
| <b>18. Signature and Title of Editor, Publisher, Business Manager, or Owner</b> | <b>Title</b>                       | <b>Date</b>            |
| Debra Eubanks                                                                   | Dir. Finance Publishing Operations | 09/13/2017 14:33:06 PM |

I certify that all information furnished on this form is true and complete. I understand that anyone who furnishes false or misleading information on this form or who omits material or information requested on the form may be subject to criminal sanctions (including fines and imprisonment) and/or civil sanctions (including civil penalties).

PS Form 3526, September 2007 (Page 2)

**PRIVACY NOTICE:** See our privacy policy on [www.usps.com](http://www.usps.com)

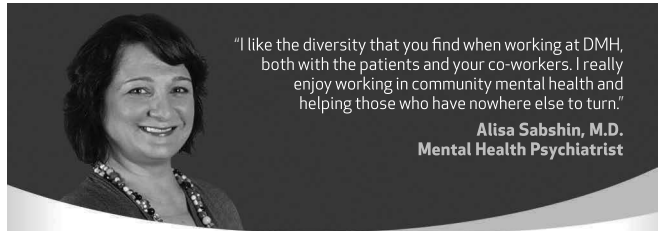

"I like the diversity that you find when working at DMH, both with the patients and your co-workers. I really enjoy working in community mental health and helping those who have nowhere else to turn."

**Alisa Sabshin, M.D.**  
Mental Health Psychiatrist

# Our work matters

Los Angeles County has immediate openings with Antelope Valley, Correctional Health Services, Juvenile Halls and Probation Camps, and directly operated programs. This is your chance to join a nationally recognized mental health agency and work in a professionally rewarding, diverse, and exciting environment. The County is filled with opportunities for professional development and growth, including new full-time and part-time psychiatrist positions.

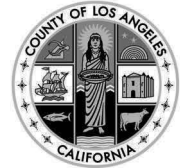

[www.psychiatristjobs.la](http://www.psychiatristjobs.la)

- ✓ Competitive starting salaries and benefits
- ✓ Potential Bonuses up to \$30,000\* a year
- ✓ Up to 24 hours /wk for outside employment

\*Depending on qualifications and placement.

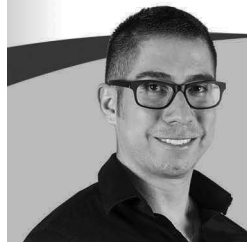

"I picked DMH because it gave me the opportunity to work with a wide variety of patient populations and overall makes my career very fulfilling. It's a great place to continue to learn, with a very nurturing environment. Come join us!"

**Carlos Contreras, M.D.**  
Mental Health Psychiatrist

**Psychiatric Services (ISSN 1075-2730; online version, 1557-9700) is published monthly by the American Psychiatric Association, editorial and executive office, 1000 Wilson Blvd., Suite 1825, Arlington, VA 22209-3901. Copyright © 2016 by the American Psychiatric Association. Printed in U.S.A. Periodicals postage paid at Arlington, VA, and at additional mailing offices. POSTMASTER: Send address changes to *Psychiatric Services*, 1000 Wilson Blvd., Suite 1825, Arlington, VA 22209-3901.**

# American Psychiatric Association Publishing Textbook of Psychopharmacology, Fifth Edition

Edited by Alan F. Schatzberg, M.D., and Charles B. Nemeroff, M.D., Ph.D.

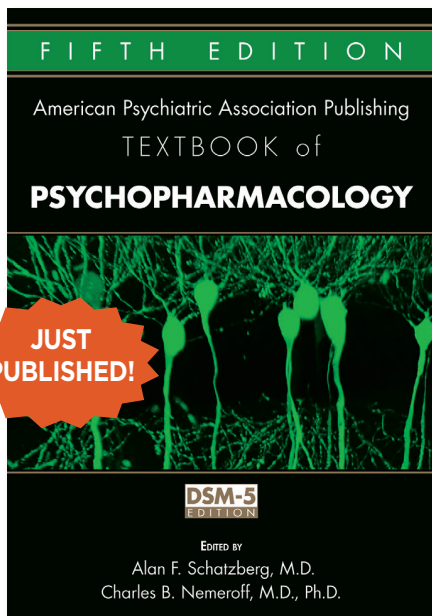

The *American Psychiatric Association Publishing Textbook of Psychopharmacology* is an indispensable and comprehensive resource for clinicians and trainees who prescribe psychotropic medications. Updated to reflect the new DSM-5 classification, this revised Fifth Edition maintains the user-friendly structure of its predecessors while offering in-depth coverage of the latest research in pharmacological principles, classes of drugs, and psychiatric disorders. Introductory chapters provide a theoretical grounding in clinical applications, with topics ranging from neurotransmitters to brain imaging in psychopharmacology. The bulk of the book is devoted to various classes of drugs, including antidepressants, anxiolytics, antipsychotics, mood stabilizers, and other agents, with each class divided into chapters on specific drugs—either new or revised to include the latest findings and trends.

Finally, the section on psychopharmacological treatment addresses evidence-based principles of clinical care for the full spectrum of mental disorders and conditions as well as for specific populations and circumstances—offering information on topics such as medication selection, combination and maintenance dosing regimens, monitoring and management of side effects, and strategies for optimizing treatment response.

## The book's beneficial features are many:

- The section on principles of pharmacology has been revised and reorganized to incorporate recent discoveries from the fields of neurobiology, genetics, brain imaging, and epidemiology.
- History and discovery, structure-activity relationships, pharmacological profiles, pharmacokinetics and disposition, mechanisms of action, indications and efficacy, side effects and toxicology, and drug-drug interactions are addressed for each agent. This consistent structure places the desired information at the clinician's fingertips and facilitates study for trainees.
- Coverage of drugs approved since the last edition is thorough, encompassing new antidepressants (e.g., vortioxetine), new antipsychotics (e.g., cariprazine), and agents on the clinical horizon (e.g., ketamine).

A work of uncommon scientific rigor and clinical utility, *The American Psychiatric Association Publishing Textbook of Psychopharmacology* provides state-of-the-art information on both the principles and the practice of psychopharmacological treatment of psychiatric disorders.

2017 • 1,823 pages • ISBN 978-1-58562-523-9 • Hardcover • \$299.00 • Item #62523

2017 • 1,823 pages • ISBN 978-1-61537-122-8 • eBook • \$240.00 • Item #37122

AMERICAN  
PSYCHIATRIC  
ASSOCIATION  
PUBLISHING

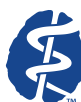

[www.appi.org](http://www.appi.org)

Email: [appi@psych.org](mailto:appi@psych.org)

Toll Free: 1-800-368-5777

20% Discount for American Psychiatric Association Members  
25% Discount for APA Resident-Fellow Members

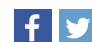

Priority Code AH1713
